# Supplementary material for: Influence of terrestrial and marine air mass on the constituents and intermixing of bioaerosols over a coastal atmosphere
Source: Copernicus journal article supplement (doi:10.5194/acp-24-12775-2024), 2024-11-19
Supplement: Supplementary file 1 [file acp-24-12775-2024-supplement.pdf]

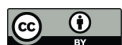

*Supplement of*

## **Influence of terrestrial and marine air mass on the constituents and intermixing of bioaerosols over a coastal atmosphere**

**Qun He et al.**

*Correspondence to:* Min Wei ([minwei@sdu.edu.cn](mailto:minwei@sdu.edu.cn))

The copyright of individual parts of the supplement might differ from the article licence.

Table S1 Sample classification and description influenced by different air masses

| Group                                                |                   | Samples |        |         |        |        |        |        |        |        |        |
|------------------------------------------------------|-------------------|---------|--------|---------|--------|--------|--------|--------|--------|--------|--------|
|                                                      | Date              | 19-Jan  | 20-Jan | 1-Mar   | 9-Mar  | 11-Mar | 12-Mar | 22-Mar | 23-Mar | 24-Mar | 25-Mar |
| TE                                                   | PM <sub>2.5</sub> | 51.35   | 124.67 | 30.58   | 16.5   | 65.63  | 38.21  | 53.05  | 77.46  | 84.42  | 60.83  |
|                                                      | Sample            | WH_1    | WH_2   | WH_7    | WH_8   | WH_10  | WH_11  | WH_15  | WH_16  | WH_17  | WH_18  |
|                                                      | Date              | 21-Jan  | 16-Mar | 21-Mar  | 29-Mar | 30-Mar | 31-Mar |        |        |        |        |
| MA                                                   | PM <sub>2.5</sub> | 7.92    | 12.38  | 15.37   | 25.38  | 25.42  | 28.83  |        |        |        |        |
|                                                      | Sample            | WH_3    | WH_13  | WH_14   | WH_22  | WH_23  | WH_24  |        |        |        |        |
|                                                      | Date              | 26-Feb  | 27-Feb | 28-Feb  | 10-Mar | 14-Mar | 26-Mar | 27-Mar | 28-Mar |        |        |
| MIX                                                  | PM <sub>2.5</sub> | 41.12   | 60.61  | 41      | 51.63  | 36.42  | 52.58  | 64.69  | 48.58  |        |        |
|                                                      | Sample            | WH_4    | WH_5   | WH_6    | WH_9   | WH_12  | WH_19  | WH_20  | WH_21  |        |        |
| PM <sub>2.5</sub> concentration (µg/m <sup>3</sup> ) | <35               | 35-75   | 75-150 | 150-250 | >250   |        |        |        |        |        |        |

TE, terrestrial air mass; MA, marine air mass; MIX, mix air mass.

**Table S2 Indicator bacterial and fungal species influenced by different air masses**

| Group     | Bacteria           |                  |                    | Fungi        |             |            |
|-----------|--------------------|------------------|--------------------|--------------|-------------|------------|
|           | TE                 | MA               | MIX                | TE           | MA          | MIX        |
| TE/MA/MIX | Enhydrobacter      | Comamonas        |                    |              |             |            |
|           | Cellulosimicrobium | Streptococcus    | Enhydrobacter      | Cladosporium | Aspergillus | Malassezia |
| TE/MA     | Pleomorphomonas    | Novosphingobium  | Lactobacillus      |              | Coprinellus | Alternaria |
|           | Lactobacillus      | Aerococcus       |                    |              |             |            |
| TE/MA     | Deinococcus        | Delftia          |                    | Cladosporium |             |            |
|           | Enhydrobacter      | Erysipelothrix   |                    | Alternaria   | Coprinellus |            |
| MA/MIX    | Sphingomonas       | Chryseobacterium |                    | Malassezia   |             |            |
|           |                    |                  | Enhydrobacter      |              |             |            |
| MA/MIX    |                    | Comamonas        | Lactobacillus      |              |             |            |
|           |                    | Streptococcus    | Cloacibacterium    |              | Aspergillus | Malassezia |
| MA/MIX    |                    | Novosphingobium  | Cellulosimicrobium |              | Coprinellus | Alternaria |
|           |                    | Aerococcus       | Pleomorphomonas    |              |             |            |
|           |                    |                  | Deinococcus        |              |             |            |
|           |                    |                  | Sphingomonas       |              |             |            |

TE, terrestrial air mass; MA, marine air mass; MIX, mix air mass.

**Table S3 Ecological of functions of bacterial and fungal communities influenced by different air masses**

| Group     | Bacteria                      |                                  |                               | Fungi                                                                    |                                   |                                      |
|-----------|-------------------------------|----------------------------------|-------------------------------|--------------------------------------------------------------------------|-----------------------------------|--------------------------------------|
|           | TE                            | MA                               | MIX                           | TE                                                                       | MA                                | MIX                                  |
| TE/MA/MIX | animal_parasites_or_symbionts |                                  | aerobic_chemoheterotrophy     | Animal Pathogen-Undefined                                                |                                   | Animal Pathogen-Undefined Saprotroph |
|           | human_pathogens_al            | hydrocarbon_degradati            | animal_parasites_or_symbionts | Saprotroph                                                               | Dung Saprotroph-Plant Saprotroph- | Animal Pathogen-Endophyte-Plant      |
|           | 1                             | human_gut                        | human_pathogens_a             | Endophyte-Plant Pathogen-Wood                                            | Wood Saprotroph                   | Pathogen-Wood Saprotroph             |
|           |                               | mammal_gut                       | II                            | Saprotroph                                                               |                                   |                                      |
| TE/MA     |                               | aromatic_compound_degradation    |                               | Animal Pathogen-Endophyte-Lichen Parasite-Plant Pathogen-Wood Saprotroph |                                   |                                      |
|           | animal_parasites_or_symbionts | human_gut                        |                               | Saprotroph                                                               | Dung Saprotroph-Plant Saprotroph- |                                      |
|           | human_pathogens_al            | mammal_gut                       |                               | Animal Pathogen-Endophyte-Plant Pathogen-Wood                            | Wood Saprotroph                   |                                      |
|           | 1                             | hydrocarbon_degradati            |                               | Pathogen-Wood Saprotroph                                                 |                                   |                                      |
|           | plant_pathogen                | aromatic_hydrocarbon_degradation |                               | Saprotroph                                                               |                                   |                                      |
|           |                               | plastic_degradation              |                               | Animal Pathogen-Undefined Saprotroph                                     |                                   |                                      |

|               |                               |                          |                                                                   |                                                  |
|---------------|-------------------------------|--------------------------|-------------------------------------------------------------------|--------------------------------------------------|
|               |                               |                          |                                                                   | <b>Animal Pathogen-<br/>Undefined Saprotroph</b> |
|               | <b>aerobic_chemoheterotr</b>  |                          |                                                                   | <b>Animal Pathogen-<br/>Endophyte-Plant</b>      |
|               | <b>ophy</b>                   | <b>hydrocarbon_degra</b> |                                                                   | <b>Pathogen-Wood</b>                             |
| <b>MA/MIX</b> | <b>animal_parasites_or_sy</b> | <b>dation</b>            | <b>Dung Saprotroph-<br/>Plant Saprotroph-<br/>Wood Saprotroph</b> | <b>Saprotroph</b>                                |
|               | <b>mbionts</b>                | <b>human_gut</b>         |                                                                   | <b>Animal Pathogen-<br/>Endophyte-Lichen</b>     |
|               | <b>human_pathogens_all</b>    | <b>mammal_gut</b>        |                                                                   | <b>Parasite-Plant</b>                            |
|               | <b>nitrate_reduction</b>      |                          |                                                                   | <b>Pathogen-Wood<br/>Saprotroph</b>              |

---

TE, terrestrial air mass; MA, marine air mass; MIX, mix air mass.

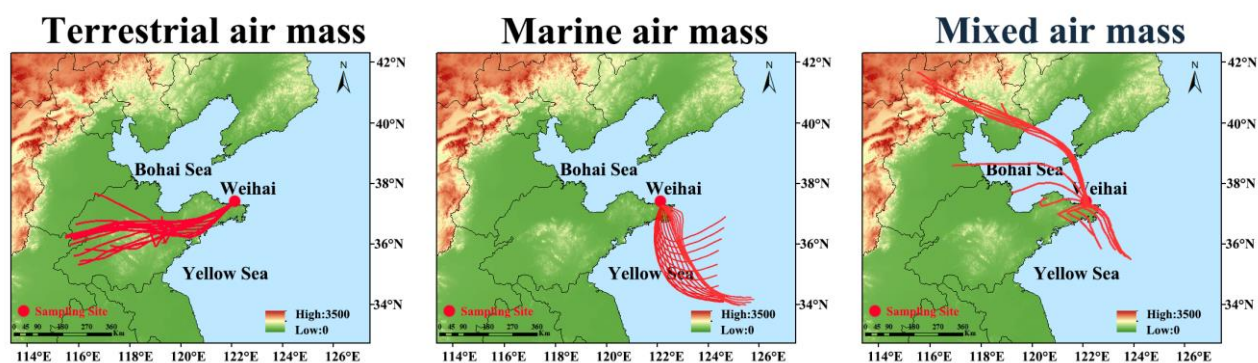

Fig. S1 The Sampling site in the coastal city of Weihai, Northern China, and the typical terrestrial, marine, and mixed air-mass are indicated.

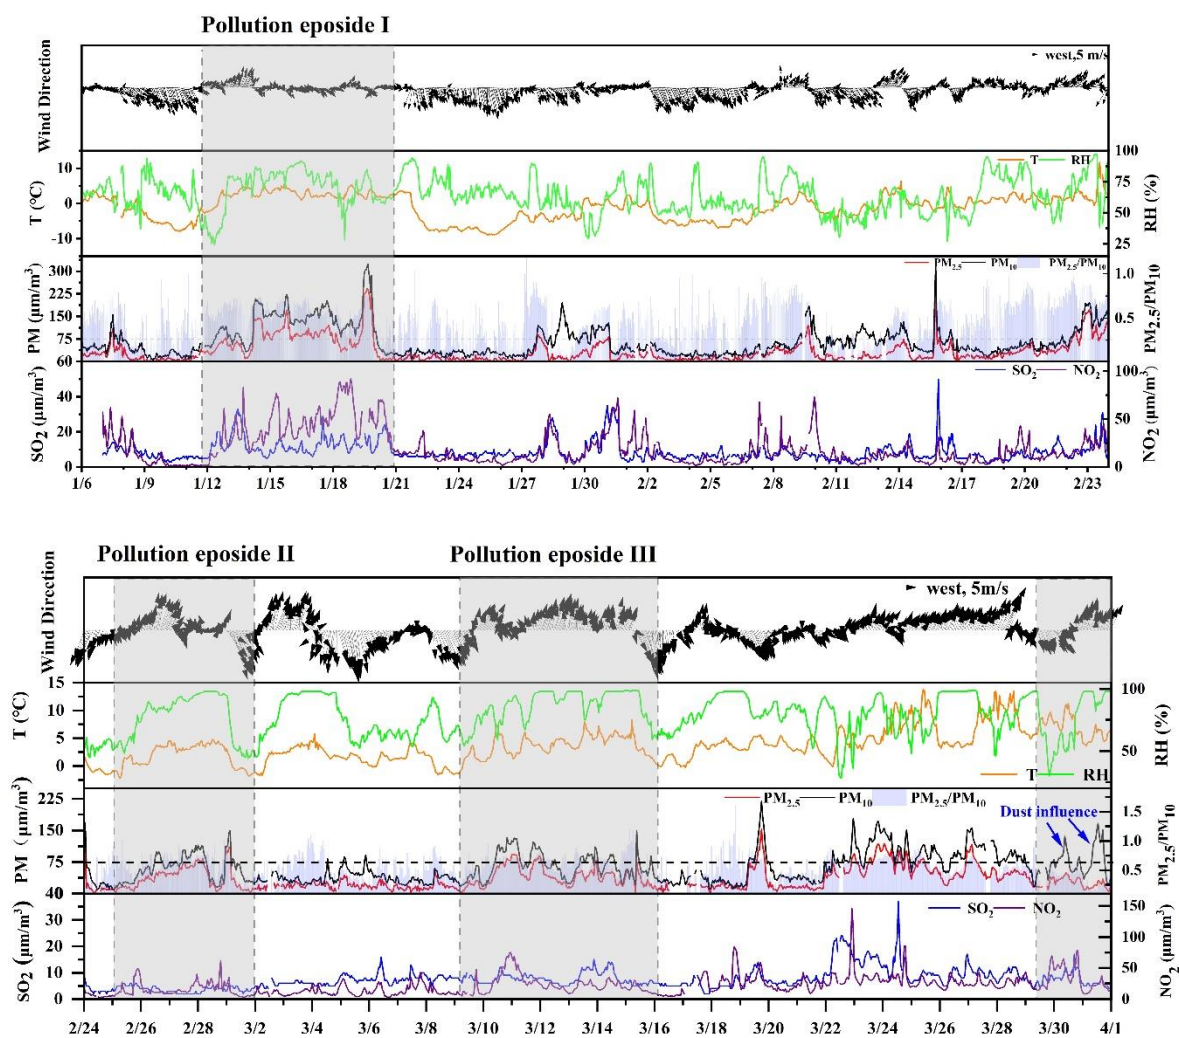

Fig. S2 Air pollutants and meteorological condition of three typical pollution episodes during the sampling period

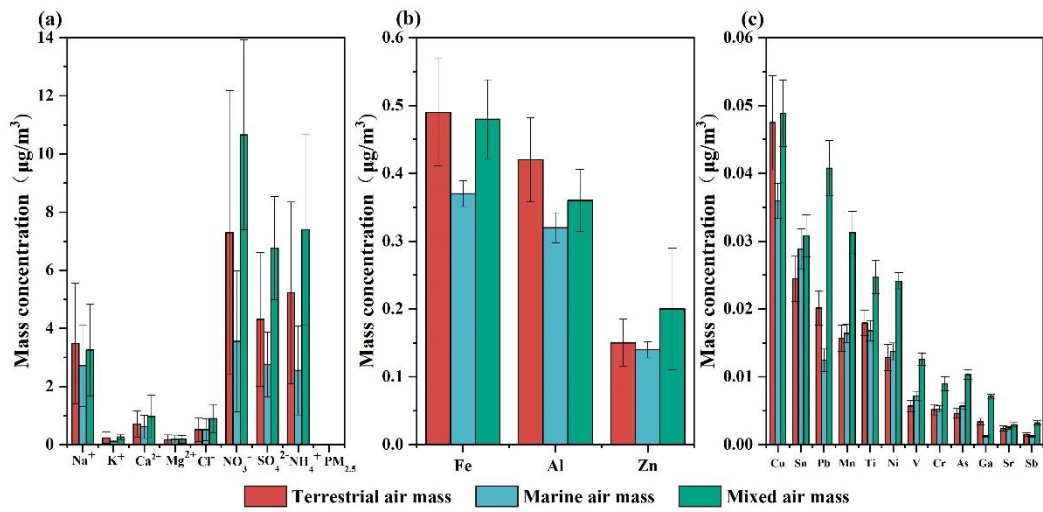

**Fig.S3. Water-soluble ions (a) and metal element concentration (b, c) in  $\text{PM}_{2.5}$  influenced by terrestrial, marine and mix air mass.**

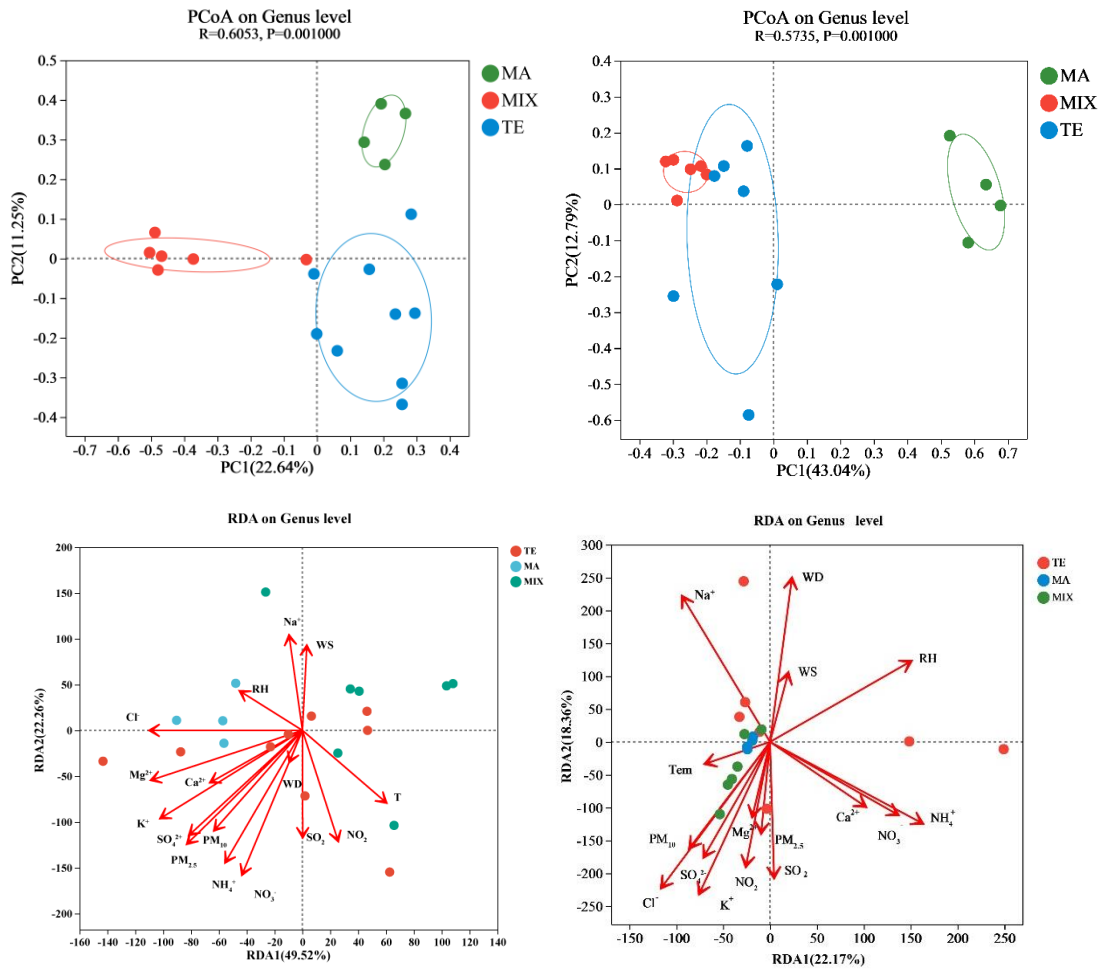

**Fig. S4 PCoA and RDA analysis of bacterial and fungal community with environmental parameters.**

**(a) Terrestrial air mass**

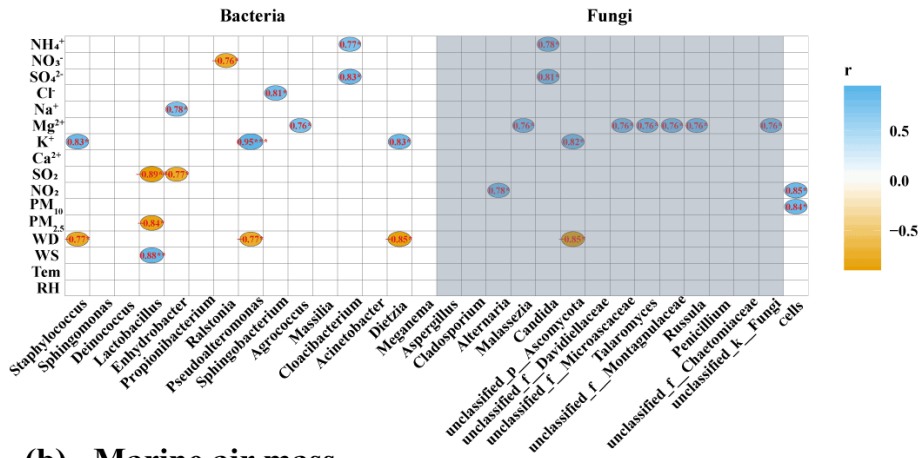

**(b) Marine air mass**

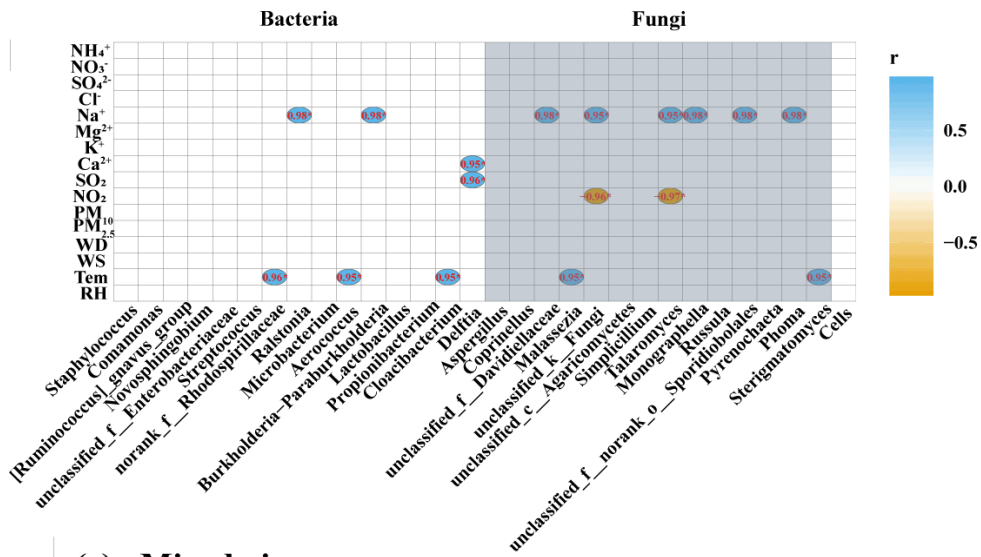

**(c) Mixed air mass**

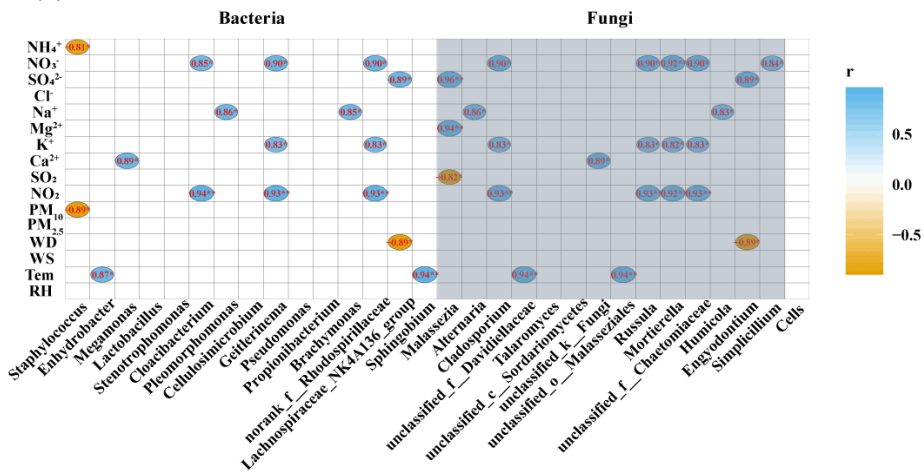

**Fig. S5 Relationships between microorganisms and environmental factors under the influence of different air masses, continental air masses (a) marine air masses (b) and mixed air masses (c).**
